# Supplementary material for: Concurrent Heavy Metal Exposures and Idiopathic Dilated Cardiomyopathy: A Case-Control Study from the Katanga Mining Area of the Democratic Republic of Congo
Source: MDPI journal article supplement (doi:10.3390/ijerph18094956), 2021-05-06
Supplement: s1 [file s1]

## Supplementary material

**Table S1.** Clinical features of subjects with dilated cardiomyopathy.

| Category                                  | Variable                                                                                                                                                                                                                                                                                                                                                                                                                                                                                                                                                                                                                                                                                                                                                               |
|-------------------------------------------|------------------------------------------------------------------------------------------------------------------------------------------------------------------------------------------------------------------------------------------------------------------------------------------------------------------------------------------------------------------------------------------------------------------------------------------------------------------------------------------------------------------------------------------------------------------------------------------------------------------------------------------------------------------------------------------------------------------------------------------------------------------------|
| Comorbidity and other risk factor n(%)    | <ul style="list-style-type: none"> <li>- Smoking in the past: 4(10)</li> <li>- Alcohol consumption: 11(27)</li> <li>- Clay consumption:16(39) <ul style="list-style-type: none"> <li>- Inactivity: 32 (78)</li> <li>- Fatigue: 38(93)</li> </ul> </li> <li>- Breathlessness: 34(83) <ul style="list-style-type: none"> <li>- Dyspnea: 36 (88)</li> <li>- Cough: 34(83)</li> </ul> </li> <li>- Orthopnea: 34 (83)</li> <li>- Nocturnal dyspnea: 19 (46) <ul style="list-style-type: none"> <li>- Nycturia: 14 (34)</li> </ul> </li> <li>- Right hypochondre pain:5(12) <ul style="list-style-type: none"> <li>- Early satiety:35(85)</li> </ul> </li> <li>- PAS: 115±20 mmHg</li> <li>- PAD: 83±16 mmHg</li> <li>- Pulse: 98±13 /min</li> <li>- SpO2: 96±5 %</li> </ul> |
| Symptoms                                  | <ul style="list-style-type: none"> <li>- NYHA: II 12(29), III 23 (56), IV 6 (15)</li> <li>- Jugular distension:13(32)</li> <li>- Arrhythmia: 12(29)</li> <li>- Murmur of MR: 30(73)</li> <li>- Murmur of TR: 13(32) <ul style="list-style-type: none"> <li>- Tachypnea: 13(32)</li> </ul> </li> <li>- Pulmonary rales: 20(49)</li> <li>- Hepatomegaly: 26(63) <ul style="list-style-type: none"> <li>- Ascites 4(10)</li> </ul> </li> <li>- Sacral edema: 27(66)</li> <li>- Legs swelling: 29(71)</li> <li>- Coldness of extremities: 1(2)</li> </ul>                                                                                                                                                                                                                  |
| Vital signs                               | <ul style="list-style-type: none"> <li>- Dilated cardiomyopathy 33(80)</li> <li>- Peripartum cardiomyopathy 8 (20) <ul style="list-style-type: none"> <li>- Thrombus 10(24)</li> <li>- LVEF: 21±8 %</li> <li>-LVIDD:6.4±0.6 cm</li> <li>- LVEDV: 229±66 ml</li> <li>- LVESV: 181 ± 55 ml</li> </ul> </li> <li>- LA volume index: 86±27 ml/m<sup>2</sup></li> <li>- Mitral E/Ea average: 15±6</li> <li>- TR Vmax 2.9±0.4 m/s</li> <li>- LVH: 32 (78)</li> <li>- LBBB: 3(7)</li> </ul>                                                                                                                                                                                                                                                                                   |
| Signs                                     | <ul style="list-style-type: none"> <li>- Atrial fibrillation: 4(10) <ul style="list-style-type: none"> <li>- PAC:5 (12)</li> <li>- PVC: 13 (32)</li> </ul> </li> <li>- QTc : 587±125 ms</li> <li>- long QT 17(52)</li> </ul>                                                                                                                                                                                                                                                                                                                                                                                                                                                                                                                                           |
| Heart failure etiology n(%)               | <ul style="list-style-type: none"> <li>- Premature ventricular contractions</li> </ul>                                                                                                                                                                                                                                                                                                                                                                                                                                                                                                                                                                                                                                                                                 |
| Echocardiographic findings & measurements | <ul style="list-style-type: none"> <li>Number: 202±297/h; 4852±7132/24h</li> </ul>                                                                                                                                                                                                                                                                                                                                                                                                                                                                                                                                                                                                                                                                                     |
| 12-lead ECG n(%)                          |                                                                                                                                                                                                                                                                                                                                                                                                                                                                                                                                                                                                                                                                                                                                                                        |
| 24h holter ECG                            |                                                                                                                                                                                                                                                                                                                                                                                                                                                                                                                                                                                                                                                                                                                                                                        |

|                  |                                                 |
|------------------|-------------------------------------------------|
|                  | Connections : doublets 31(79)                   |
|                  | Triplets 21(54)                                 |
|                  | Bigeminy 18(46)                                 |
|                  | Trigeminy 14(36)                                |
|                  | Morphology: monomorphic 10(26)                  |
|                  | Polymorphic 28(72)                              |
|                  | Coupling: short 3(8)                            |
|                  | Long 24(61)                                     |
|                  | Variable 12(31)                                 |
|                  | <b>-Ventricular tachycardia</b>                 |
|                  | Non-sustained VT 20(51), 7±10 episodes/24h      |
|                  | - Furosemide 39 (95)                            |
|                  | - Beta-blocker 8 (20)                           |
|                  | - ACE-i 35 (85)                                 |
|                  | - ARB 4(10)                                     |
|                  | - Spironolactone 9 (22)                         |
|                  | - Isosorbide dinitrate 4(10)                    |
|                  | - LMWH 2(5)                                     |
|                  | - Acenocoumarol 7 (17)                          |
|                  | - Inpatient 32 (78)                             |
| <b>Treatment</b> |                                                 |
|                  |                                                 |
|                  |                                                 |
| <b>Outcome</b>   | - Mean (SD) length of hospitalization 14±8 days |
|                  | - Early mortality 4(10)                         |

**Table S2.** Comparison of heart failure patients to controls according to demography, education level, and routine biology.

| variables                              | Control (n=29) | HF patients (n=41) | p                 |
|----------------------------------------|----------------|--------------------|-------------------|
| Age, years                             | 43±11          | 48±14              | 0.1121            |
| Sex, n(%)                              |                |                    |                   |
| Female                                 | 14(48)         | 20(49)             | 0.9668            |
| Male                                   | 15(52)         | 21(51)             |                   |
| Education's level                      |                |                    |                   |
| Primary-to-secondary                   | 12(41)         | 30(73)             | <b>0.0075</b>     |
| University and post-univ               | 17(59)         | 11(27)             |                   |
| BMI, kg/m <sup>2</sup>                 | 26.6±2.5       | 25.2±4.9           | 0.1414            |
| Glycemia, mg/dl                        | 88±18          | 108±37             | <b>0.0042</b>     |
| Total cholesterol, mg/dl               | 183±37         | 188±67             | 0.6965            |
| HDL, mg/dl                             | 46±9           | 40±19              | <u>0.0723</u>     |
| LDL, mg/dl                             | 118±37         | 128±52             | 0.3708            |
| Triglycerides, mg/dl                   | 95±55          | 102±37             | 0.5387            |
| Urea, mg/dl                            | 26±7           | 53±30              | <b>&lt;0.0001</b> |
| Creatinine, mg/dl                      | 0.9±0.2        | 1.2±0.4            | <b>0.0005</b>     |
| GFR, ml/min/1.73m <sup>2</sup>         | 85±18          | 66±21              | <b>&lt;0.0001</b> |
| Renal dysfunction, n(%)                | 2(7)           | 17(41)             | <b>0.0014</b>     |
| Uric acid, mg/dl                       | 6.1±1.6        | 10.7±3.7           | <b>&lt;0.0001</b> |
| Total bilirubin, mg/dl                 | 0.7±0.4        | 1.6±2.4            | <b>0.0259</b>     |
| Direct bilirubin, mg/dl                | 0.2±0.1        | 0.9±2.2            | <b>0.0434</b>     |
| AST, U/l                               | 27±6           | 101±311            | 0.1351            |
| ALT, U/l                               | 29±13          | 84±148             | <b>0.0225</b>     |
| Calcium, mg/dl                         | 8.7±0.3        | 8.4±0.6            | <b>0.008</b>      |
| Hypocalcemia, n(%)                     | 3(10)          | 21(51)             | <b>0.0004</b>     |
| Magnesium, mg/dl                       | 2.04±0.2       | 2.03±0.4           | 0.9167            |
| Hypomagnesemia, n(%)                   | 0(0)           | 6(15)              | <b>0.0343</b>     |
| Sodium, mEq/l                          | 140.5±1.8      | 138.2±4.4          | <b>0.0037</b>     |
| Hyponatremia, n(%)                     | 0(0)           | 10 (24)            | <b>0.0039</b>     |
| Potassium, mEq/l                       | 4.2±0.4        | 3.7±0.7            | <b>0.0018</b>     |
| Hypokalemia, n(%)                      | 1(3)           | 14(34)             | <b>0.0024</b>     |
| Chlorure, mEq/l                        | 103.4±2.3      | 102.6±5.4          | 0.4198            |
| C-reactive protein, mg/l               | 7±17           | 45±44              | <b>&lt;0.0001</b> |
| CRP, n(%)                              | 2(7)           | 32(78)             | <b>&lt;0.0001</b> |
| White blood cell, x10 <sup>3</sup> /μl | 4.1±0.8        | 6.9±3.2            | <b>&lt;0.0001</b> |
| Lymphocytes, x10 <sup>3</sup> /μl      | 1.9±0.5        | 1.8±1.1            | 0.3717            |
| Monocytes, x10 <sup>3</sup> /μl        | 0.4±0.1        | 0.7±0.3            | <b>&lt;0.0001</b> |
| Granulocytes, x10 <sup>3</sup> /μl     | 1.8±0.5        | 4.5±2.9            | <b>&lt;0.0001</b> |
| Red blood cell, x10 <sup>6</sup> /μl   | 5±0.7          | 5.2±0.6            | 0.3253            |
| Hemoglobin, g/dl                       | 14.2±2.3       | 13.6±1.4           | 0.1842            |
| Hematocrit, %                          | 40.7±6.7       | 38.5±5.7           | 0.1353            |
| MCV, fL                                | 81±9           | 76±7               | <b>0.0080</b>     |
| MCH, pg                                | 28±4           | 27±3               | <b>0.0188</b>     |
| MCHC, g/dl                             | 35±0.8         | 34±2               | <b>0.0341</b>     |
| RDW, %                                 | 13±3           | 16±3               | <b>0.0001</b>     |
| Platelets, x10 <sup>3</sup> /μl        | 210±63         | 226±78             | 0.3490            |
| MPV, fL                                | 9.4±0.7        | 9.4±0.8            | 0.9530            |
| PCT, %                                 | 0.19±0.06      | 0.21±0.07          | 0.2392            |
| PDW, %                                 | 13.7±2.3       | 14.2±2.4           | 0.3718            |
| INR                                    | 1.1±0.2        | 1.4±1.0            | 0.0920            |
| Urinary Tract Infection                | 4(14)          | 12(29)             | 0.1064            |

**Table S3.** Correlations between blood (b) and urine (u) metal concentrations.

|           | <b>bAntimony</b> | <b>bArsenic</b> | <b>bCopper</b>   | <b>bVanadium</b> | <b>bZinc</b>    |
|-----------|------------------|-----------------|------------------|------------------|-----------------|
| uChromium | -0.22701         | <b>0.40382</b>  | <b>0.36284</b>   | 0.09298          | -0.06249        |
|           | 0.1056           | <b>0.0030</b>   | <b>0.0082</b>    | 0.5121           | 0.6598          |
| uCopper   | <b>-0.63067</b>  | <b>0.42944</b>  | <b>0.73235</b>   | -0.28714         | -0.41424        |
|           | <b>&lt;.0001</b> | <b>0.0015</b>   | <b>&lt;.0001</b> | <b>0.0390</b>    | <b>0.0023</b>   |
| uZinc     | <b>-0.55511</b>  | <b>0.37591</b>  | <b>0.59046</b>   | -0.34853         | <b>-0.35405</b> |
|           | <b>&lt;.0001</b> | <b>0.0060</b>   | <b>&lt;.0001</b> | <b>0.0113</b>    | <b>0.0100</b>   |
| uSelenium | -0.35934         | <b>0.29941</b>  | <b>0.46581</b>   | 0.00273          | -0.08427        |
|           | <b>0.0089</b>    | <b>0.0311</b>   | <b>0.0005</b>    | 0.9847           | 0.5526          |
| uCadmium  | <b>-0.50295</b>  | <b>0.40502</b>  | <b>0.70435</b>   | -0.17888         | -0.31785        |
|           | <b>0.0001</b>    | <b>0.0029</b>   | <b>&lt;.0001</b> | 0.2045           | <b>0.0217</b>   |
| uAntimony | -0.39179         | <b>0.43208</b>  | <b>0.34748</b>   | -0.30900         | -0.29591        |
|           | <b>0.0041</b>    | <b>0.0014</b>   | <b>0.0116</b>    | <b>0.0258</b>    | <b>0.0332</b>   |
| uThallium | -0.35644         | 0.18458         | <b>0.42227</b>   | -0.14857         | -0.31281        |
|           | <b>0.0095</b>    | 0.1902          | <b>0.0018</b>    | 0.2932           | <b>0.0240</b>   |
| uUranium  | -0.29625         | <b>0.37514</b>  | <b>0.52591</b>   | -0.10084         | -0.35764        |
|           | <b>0.0330</b>    | <b>0.0061</b>   | <b>&lt;.0001</b> | 0.4769           | <b>0.0092</b>   |

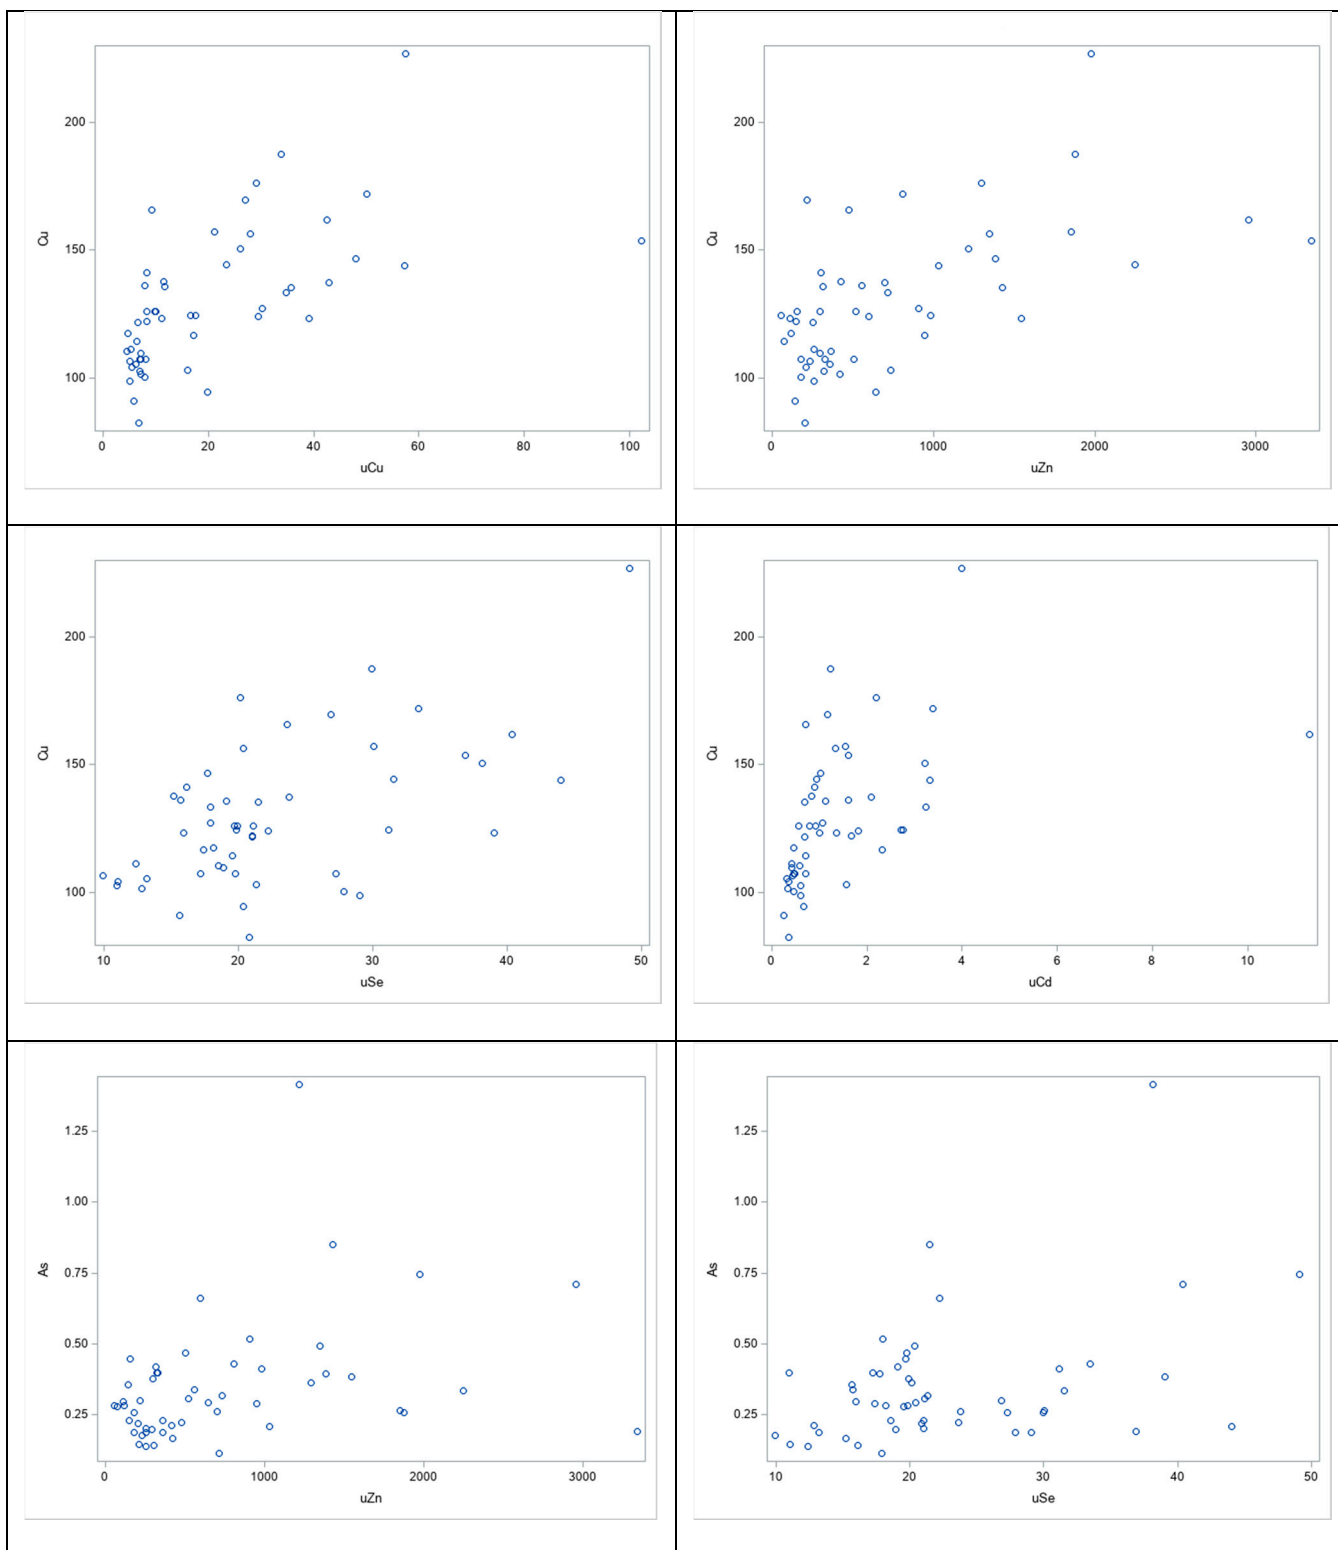

**Figure S1.** Illustrative correlations between concentrations of copper or arsenic in the blood and concentrations of zinc, selenium, cadmium, and copper in the urine.
